# Supplementary material for: Cell Fusion of Mesenchymal Stem/Stromal Cells and Breast Cancer Cells Leads to the Formation of Hybrid Cells Exhibiting Diverse and Individual (Stem Cell) Characteristics
Source: PubMed Central journal article supplement (PMC7765946; doi:10.3390/ijms21249636), 2020-12-17
Supplement: ijms-21-09636-s001.pdf [file ijms-21-09636-s001.pdf]

Supplementary Materials:

Table S1. Genotypic analysis of MM- and MH-hybrid cells via short tandem repeat analysis.

| Locus               | IMSC#3 |     | HS578T Hyg |     | IM#7 | IM#9 | Locus               | IMSC#3 |     | MDA-MB-231 Hyg |     | IM#2 | IM#3 |
|---------------------|--------|-----|------------|-----|------|------|---------------------|--------|-----|----------------|-----|------|------|
|                     | 128    | 128 | 129        | 129 |      |      |                     | 128    | 128 | 128            | 128 |      |      |
| D3S1358             | 128    | 128 | 129        | 129 |      |      | D3S1358             | 128    | 129 | 128            | 128 |      |      |
| TH01 <sup>1</sup>   | 170    |     | 170        | 170 |      |      | TH01 <sup>1</sup>   | 170    | 166 | 166            | 166 |      |      |
|                     | 174    | 174 | 174        | 174 |      |      |                     | 174    |     | 174            | 174 | 174  |      |
| D21S11              |        | 177 | 177        | 177 |      |      | D21S11              |        | 177 | 177            | 177 |      |      |
|                     | 215    |     | 215        | 216 |      |      |                     | 215    |     | 216            | 216 |      |      |
|                     |        | 220 | 219        | 220 |      |      |                     | 223    | 224 | 223            | 223 |      |      |
| D18S51              | 223    |     | 223        | 223 |      |      | D18S51              |        | 238 | 238            | 238 |      |      |
|                     |        | 234 | 233        | 233 |      |      |                     |        | 295 | 295            | 295 |      |      |
|                     | 306    |     | 307        | 307 |      |      |                     | 306    |     | 307            | 307 |      |      |
| Penta E             |        | 314 | 314        | 314 |      |      | Penta E             |        | 314 | 314            | 314 |      |      |
|                     | 326    |     | 326        | 326 |      |      |                     | 326    |     | 326            | 326 |      |      |
|                     | 413    |     | 413        | 413 |      |      |                     |        | 408 | 408            | 408 |      |      |
| D5S818              |        | 418 | 418        | 418 |      |      | D5S818              | 413    |     | 413            | 413 |      |      |
|                     | 424    | 424 | 424        | 423 |      |      |                     | 424    |     | 423            | 423 |      |      |
| D13S317             | 127    |     | 127        | 127 |      |      | D13S317             | 127    |     | 127            | 127 |      |      |
|                     |        | 131 | 131        | 131 |      |      |                     | 135    | 135 | 135            | 135 |      |      |
| D7S820              | 135    |     | 135        | 135 |      |      | D7S820              | 176    |     | 176            | 176 |      |      |
|                     | 176    |     | 176        | 176 |      |      |                     |        | 196 | 196            | 196 |      |      |
| D16S539             |        | 188 | 188        | 188 |      |      | D16S539             | 200    |     | 200            | 200 |      |      |
|                     | 200    |     | 200        | 200 |      |      |                     |        | 221 | 220            | 220 |      |      |
| CSF1PO <sup>2</sup> | 224    |     | 224        | 224 |      |      | CSF1PO <sup>2</sup> | 224    | 224 | 224            | 224 |      |      |
|                     | 228    | 228 | 228        | 228 |      |      |                     | 228    |     | 228            | 228 |      |      |
| Penta D             | 283    |     | 283        | 283 |      |      | Penta D             | 283    |     | 283            | 283 |      |      |
|                     | 287    |     | 287        | 287 |      |      |                     | 287    |     | 287            | 287 |      |      |
| Am                  |        | 291 | 291        | 291 |      |      | Am                  |        | 291 | 291            | 291 |      |      |
|                     | 338    |     | 338        | 338 |      |      |                     | 338    |     | 338            | 338 |      |      |
| vWA <sup>3</sup>    | 346    | 346 | 346        | 346 |      |      | vWA <sup>3</sup>    | 346    | 346 | 346            | 346 |      |      |
|                     |        | 394 | 394        | 394 |      |      |                     |        | 399 | 399            | 399 |      |      |
| D8S1179             | 399    |     | 399        | 399 |      |      | D8S1179             | 413    | 408 | 408            | 408 |      |      |
|                     | 413    |     | 413        | 413 |      |      |                     | 413    |     | 413            | 413 |      |      |
| TPOX <sup>4</sup>   |        | 418 | 418        | 418 |      |      | TPOX <sup>4</sup>   |        | 422 | 422            | 423 |      |      |
|                     | 104    | 104 | 104        | 104 |      |      |                     | 104    | 104 | 104            | 104 |      |      |
| FGA <sup>5</sup>    | 110    |     | 110        | 110 |      |      | FGA <sup>5</sup>    | 110    |     | 110            | 110 |      |      |
|                     | 138    |     | 138        | 139 |      |      |                     | 138    |     | 138            | 138 |      |      |
| D18S51              | 146    |     | 146        | 146 |      |      | D18S51              | 142    | 142 | 142            | 142 |      |      |
|                     |        | 150 | 150        | 150 |      |      |                     | 146    |     | 146            | 146 |      |      |
| TPOX <sup>4</sup>   |        | 222 | 222        | 222 |      |      | TPOX <sup>4</sup>   | 158    | 158 | 158            | 158 |      |      |
|                     | 222    |     | 222        | 222 |      |      |                     | 222    | 222 | 222            | 222 |      |      |
| FGA <sup>5</sup>    |        | 226 | 226        | 226 |      |      | FGA <sup>5</sup>    |        | 226 | 226            | 226 |      |      |
|                     | 230    |     | 230        | 230 |      |      |                     | 230    |     | 230            | 230 |      |      |
| TPOX <sup>4</sup>   | 269    | 269 | 269        | 269 |      |      | TPOX <sup>4</sup>   | 269    | 269 | 269            | 269 |      |      |
|                     |        | 281 | 281        | 281 |      |      |                     |        | 273 | 273            | 273 |      |      |
| FGA <sup>5</sup>    | 281    |     | 281        | 281 |      |      | FGA <sup>5</sup>    | 281    |     | 281            | 281 |      |      |
|                     | 337    |     | 337        | 337 |      |      |                     | 337    |     | 337            | 337 |      |      |
| TPOX <sup>4</sup>   | 346    |     | 346        | 346 |      |      | TPOX <sup>4</sup>   | 346    | 346 | 346            | 346 |      |      |
|                     |        | 350 | 350        | 350 |      |      |                     |        | 350 | 350            | 350 |      |      |

<sup>1</sup>TH01: human tyrosine hydrolase; <sup>2</sup>CSF1PO: human c-fms proto-oncogene for CSF-1 receptor; <sup>3</sup>vWA: human von Willebrand factor; <sup>4</sup>TPOX: human thyroid peroxidase; <sup>5</sup>FGA: human alpha fibrinogen

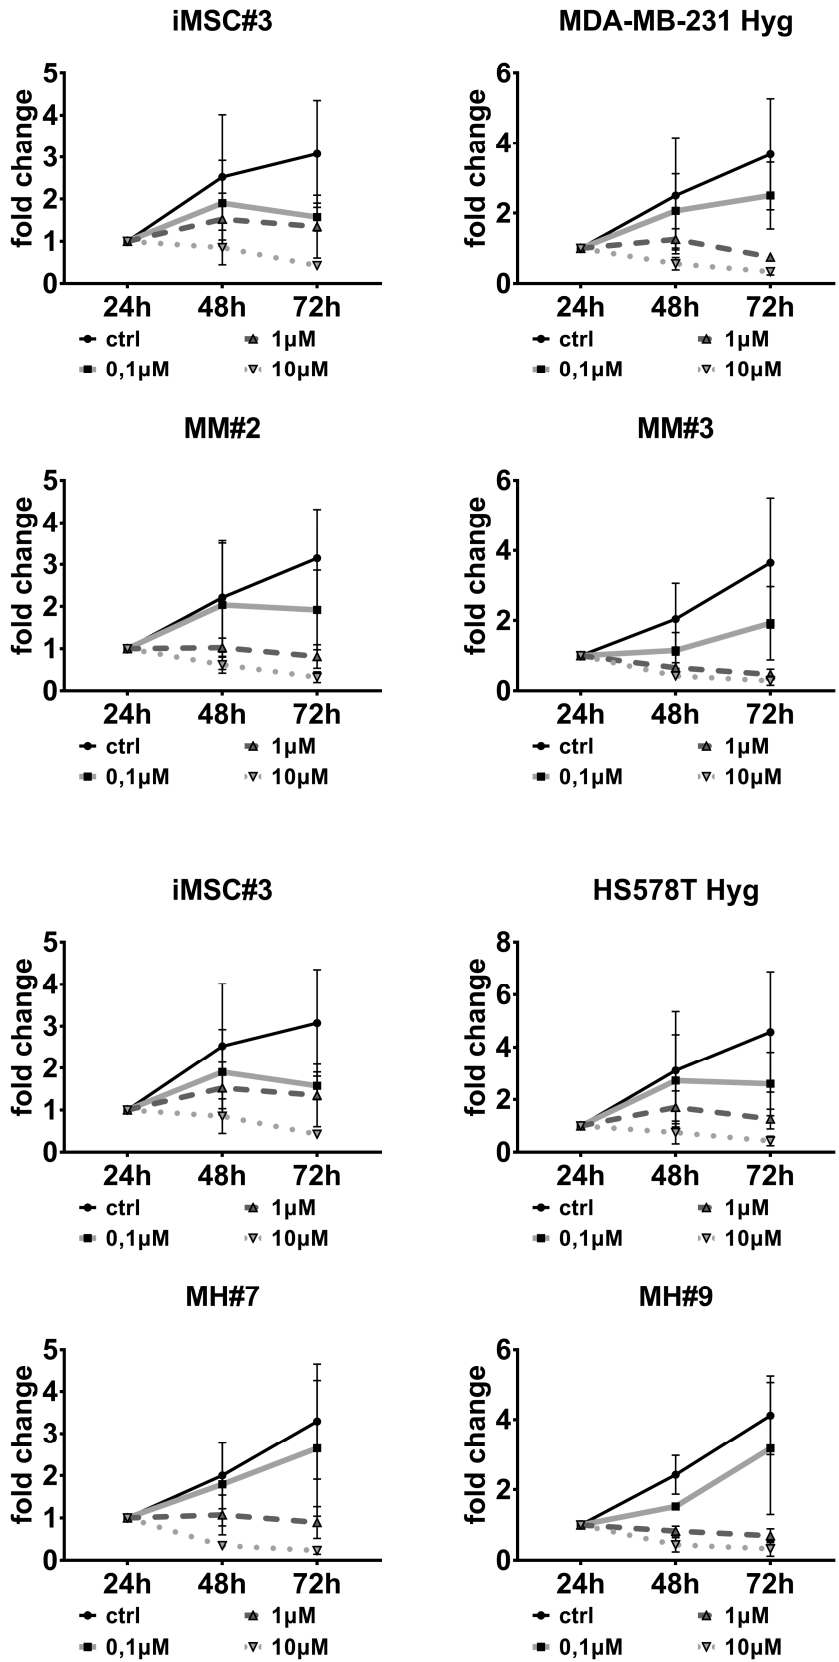

**Figure S1.** Cytotoxicity tests with Doxorubicin demonstrated, that hybrid cells MH#7, MH#9 and MM#3 exhibited a resistance against 0,1µM Doxorubicin. Shown are the means (with SEM) of three independent XTT-assays.

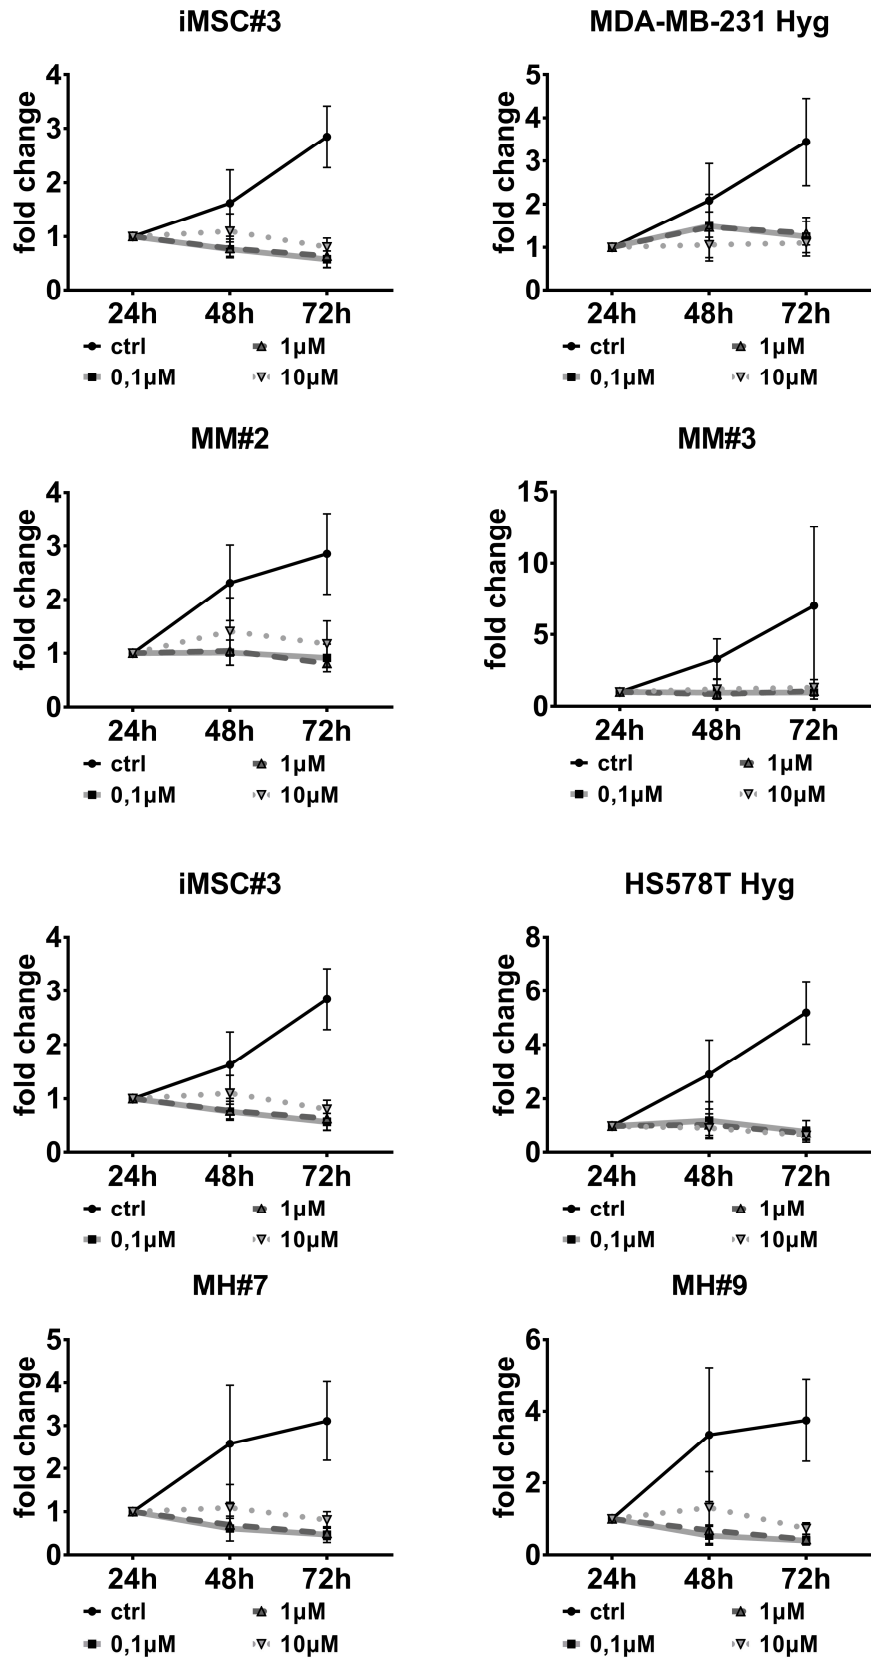

**Figure S2.** XTT-analysis of cells treated with different concentrations (0,1/ 1/ 10μM) of Paclitaxel. In contrast to the results for Doxorubicin, treatment with Paclitaxel led to the death of nearly all cells. Shown are the means (with SEM) of three independent experiments.
